# Supplementary material for: Hybrid Sterility Locus on Chromosome X Controls Meiotic Recombination Rate in Mouse
Source: PLoS Genet. 2016 Apr 22;12(4):e1005906. doi: 10.1371/journal.pgen.1005906 (PMC4841592; doi:10.1371/journal.pgen.1005906)
Supplement: S1 Table — (XLSX) [file pgen.1005906.s004.xlsx]

## Sheet: consoA_summary_0924_SE
Table S1. Summary of MLH1 counts in chromosome substitution strains with PWD autosomes
Mouse strain	Mouse No.	No. of cells	MLH1 - mean	MLH1 - SD*	MLH1 - SE
B6	1	20	24.35	1.79	0.4
B6	2	14	24.64	1.65	0.44
B6	3	22	25.45	3.11	0.66
B6	4	20	24.9	1.89	0.42
B6 - Total		76	24.87	(24.29; 25.47)
B6.PWD-Chr 1	1	20	24.35	1.57	0.35
B6.PWD-Chr 1	2	20	24.2	1.94	0.43
B6.PWD-Chr 1	3	20	25.8	1.64	0.37
B6.PWD-Chr 1	4	20	25.55	3.02	0.67
B6.PWD-Chr 1	5	20	24.45	2.84	0.63
B6.PWD-Chr 1 - Total		100	24.87	(24.37; 25.40)
B6.PWD-Chr 2	1	20	24.95	1.64	0.37
B6.PWD-Chr 2	2	20	26.2	3.25	0.73
B6.PWD-Chr 2	3	20	26	3.51	0.78
B6.PWD-Chr 2	4	20	25.15	1.6	0.36
B6.PWD-Chr 2	5	20	25.55	2.98	0.67
B6.PWD-Chr 2	6	20	25.7	2.11	0.47
B6.PWD-Chr 2 - Total		120	25.59	(25.10; 26.10)
B6.PWD-Chr 3	1	20	24.15	1.81	0.41
B6.PWD-Chr 3	2	21	24.14	2.24	0.49
B6.PWD-Chr 3	3	15	23.73	2.02	0.52
B6.PWD-Chr 3	4	20	24.15	2.83	0.63
B6.PWD-Chr 3	5	20	25.15	2.28	0.51
B6.PWD-Chr 3 - Total		96	24.29	(23.81; 24.80)
B6.PWD-Chr 4	1	20	24.05	2.24	0.5
B6.PWD-Chr 4	2	20	24.6	2.26	0.5
B6.PWD-Chr 4	3	20	25.05	1.7	0.38
B6.PWD-Chr 4	4	20	25.1	2.2	0.49
B6.PWD-Chr 4	5	20	25.3	2.18	0.49
B6.PWD-Chr 4 - Total		100	24.82	(24.32; 25.35)
B6.PWD-Chr 5	1	20	24.05	2.67	0.6
B6.PWD-Chr 5	2	20	24.2	2.04	0.46
B6.PWD-Chr 5	3	20	24.3	1.78	0.4
B6.PWD-Chr 5	4	20	24.5	2.14	0.48
B6.PWD-Chr 5	5	20	24.6	1.88	0.42
B6.PWD-Chr 5 - Total		100	24.33	(23.86; 24.83)
B6.PWD-Chr 6	1	22	28.18	3.23	0.69
B6.PWD-Chr 6	2	20	26.25	2.22	0.5
B6.PWD-Chr 6	3	21	25.43	1.86	0.41
B6.PWD-Chr 6	4	19	26.79	2.1	0.48
B6.PWD-Chr 6	5	20	26.55	2.06	0.46
B6.PWD-Chr 6	6	40	24.8	1.8	0.28
B6.PWD-Chr 6	7	40	25.18	1.88	0.3
B6.PWD-Chr 6	8	40	25.73	2.5	0.4
B6.PWD-Chr 6 - Total		222	25.89	(25.55; 26.35)
B6.PWD-Chr 7	1	67	27	2.1	0.26
B6.PWD-Chr 7	2	32	26.28	2.19	0.39
B6.PWD-Chr 7	3	31	27.58	2.33	0.42
B6.PWD-Chr 7	4	29	27.45	1.84	0.34
B6.PWD-Chr 7	5	40	26.12	3.2	0.51
B6.PWD-Chr 7	6	40	26.85	2.23	0.35
B6.PWD-Chr 7	7	40	28.07	2.63	0.42
B6.PWD-Chr 7 - Total		279	27.04	(26.63; 27.46)
B6.PWD-Chr 7F1	1	20	25.35	2.23	0.5
B6.PWD-Chr 7F1	2	20	25.5	2.06	0.46
B6.PWD-Chr 7F1	3	20	24.2	2.48	0.56
B6.PWD-Chr 7F1	4	20	25.5	2.59	0.58
B6.PWD-Chr 7F1	5	19	25.21	1.96	0.45
B6.PWD-Chr 7F1 - Total		99	25.15	(24.63; 25.70)
B6.PWD-Chr 9	1	46	23.74	1.73	0.26
B6.PWD-Chr 9	2	60	24.27	2.19	0.28
B6.PWD-Chr 9 - Total		106	24.04	(23.53; 24.56)
B6.PWD-Chr 10.2	1	20	24.15	2.16	0.48
B6.PWD-Chr 10.2	2	20	23.85	1.81	0.41
B6.PWD-Chr 10.2	3	20	24.6	2.76	0.62
B6.PWD-Chr 10.2	4	20	25.2	1.7	0.38
B6.PWD-Chr 10.2 - Total		80	24.45	(23.92; 25.02)
B6.PWD-Chr 10.3	1	40	24.6	2.86	0.45
B6.PWD-Chr 10.3	2	40	25.52	2.39	0.38
B6.PWD-Chr 10.3	3	40	25.23	2.74	0.43
B6.PWD-Chr 10.3	4	40	25.7	2.45	0.39
B6.PWD-Chr 10.3	5	40	26.1	2.82	0.45
B6.PWD-Chr 10.3 - Total		200	25.43	(25.02; 25.85)
B6.PWD-Chr 11.1	1	20	23.95	2.14	0.48
B6.PWD-Chr 11.1	2	20	24.2	1.79	0.4
B6.PWD-Chr 11.1	3	20	23.7	2.25	0.5
B6.PWD-Chr 11.1	4	20	24.2	1.96	0.44
B6.PWD-Chr 11.1	5	20	23.7	2.2	0.49
B6.PWD-Chr 11.1	6	40	23.35	1.87	0.3
B6.PWD-Chr 11.1	7	40	23.85	2.69	0.43
B6.PWD-Chr 11.1 - Total		180	23.79	(23.46; 24.16)
B6.PWD-Chr 11.2	1	20	24.2	1.51	0.34
B6.PWD-Chr 11.2	2	40	23.18	1.75	0.28
B6.PWD-Chr 11.2	3	40	23.2	2.02	0.32
B6.PWD-Chr 11.2	4	40	23.05	1.97	0.31
B6.PWD-Chr 11.2	5	40	23.57	1.69	0.27
B6.PWD-Chr 11.2 - Total		180	23.36	(23.03; 23.72)
B6.PWD-Chr 11.3	1	20	24.8	1.54	0.34
B6.PWD-Chr 11.3	2	20	23.85	1.63	0.36
B6.PWD-Chr 11.3	3	20	24.25	2.24	0.5
B6.PWD-Chr 11.3	4	20	24.55	2.28	0.51
B6.PWD-Chr 11.3	5	20	23.25	2.05	0.46
B6.PWD-Chr 11.3 - Total		100	24.14	(23.68; 24.63)
B6.PWD-Chr 12	1	20	25.4	1.76	0.39
B6.PWD-Chr 12	2	20	24.8	2.02	0.45
B6.PWD-Chr 12	3	20	26.15	2.52	0.56
B6.PWD-Chr 12	4	20	25	2.05	0.46
B6.PWD-Chr 12	5	20	26.7	1.84	0.41
B6.PWD-Chr 12 - Total		100	25.61	(25.07; 26.17)
B6.PWD-Chr 13	1	40	24.2	1.86	0.29
B6.PWD-Chr 13	2	40	24.5	2	0.32
B6.PWD-Chr 13	3	40	24.32	2.26	0.36
B6.PWD-Chr 13 - Total		120	24.34	(23.88; 24.83)
B6.PWD-Chr 14	1	20	25.75	1.55	0.35
B6.PWD-Chr 14	2	20	24.55	2.19	0.49
B6.PWD-Chr 14	3	20	24.3	1.75	0.39
B6.PWD-Chr 14	4	20	25.6	2.44	0.54
B6.PWD-Chr 14	5	19	25.47	1.68	0.39
B6.PWD-Chr 14	6	20	24.55	2.09	0.47
B6.PWD-Chr 14 - Total		119	25.03	(24.56; 25.52)
B6.PWD-Chr 15	1	19	23.32	2.4	0.55
B6.PWD-Chr 15	2	20	24	1.81	0.4
B6.PWD-Chr 15	3	20	24.2	1.54	0.34
B6.PWD-Chr 15	4	20	24.1	1.8	0.4
B6.PWD-Chr 15	5	20	23.9	1.83	0.41
B6.PWD-Chr 15	6	20	24.45	2.31	0.52
B6.PWD-Chr 15 - Total		119	24	(23.58; 24.44)
B6.PWD-Chr 16	1	20	25.2	2.59	0.58
B6.PWD-Chr 16	2	20	24.55	2.35	0.53
B6.PWD-Chr 16	3	20	24.65	2.23	0.5
B6.PWD-Chr 16	4	20	23.6	1.64	0.37
B6.PWD-Chr 16	5	20	24.6	2.19	0.49
B6.PWD-Chr 16 - Total		100	24.52	(24.04; 25.03)
B6.PWD-Chr 17	1	18	25.06	1.8	0.42
B6.PWD-Chr 17	2	20	25.5	2.4	0.54
B6.PWD-Chr 17	3	20	23.55	2.28	0.51
B6.PWD-Chr 17	4	20	24.6	2.54	0.57
B6.PWD-Chr 17	5	20	24.05	2.33	0.52
B6.PWD-Chr 17	6	20	24.3	2.25	0.5
B6.PWD-Chr 17 - Total		118	24.5	(24.05; 24.97)
B6.PWD-Chr 18	1	20	25.2	2.14	0.48
B6.PWD-Chr 18	2	20	26.1	2.07	0.46
B6.PWD-Chr 18	3	20	26	1.49	0.33
B6.PWD-Chr 18	4	20	25.85	1.46	0.33
B6.PWD-Chr 18 - Total		80	25.79	(25.18; 26.43)
B6.PWD-Chr 19	1	20	25.7	2.18	0.49
B6.PWD-Chr 19	2	20	25.7	2	0.45
B6.PWD-Chr 19	3	20	24.75	2.2	0.49
B6.PWD-Chr 19	4	22	24	1.83	0.39
B6.PWD-Chr 19	5	20	25.6	1.79	0.4
B6.PWD-Chr 19 - Total		102	25.13	(24.62; 25.67)
PWD	1	20	30.3	2.81	0.63
PWD	2	20	29.3	1.92	0.43
PWD	3	20	29.15	2.32	0.52
PWD - Total		60	29.58	(28.66; 30.56)
* The 95% CI based on the used GLMM model is given instead of SD for the summary strain statistics.
