# Supplementary material for: Hybrid Sterility Locus on Chromosome X Controls Meiotic Recombination Rate in Mouse
Source: PLoS Genet. 2016 Apr 22;12(4):e1005906. doi: 10.1371/journal.pgen.1005906 (PMC4841592; doi:10.1371/journal.pgen.1005906)
Supplement: S2 Table — (XLSX) [file pgen.1005906.s005.xlsx]

## Sheet: Sheet1
S2 Table. MLH1 counts in chromosome substitution strains with PWD autosomes.
Simultaneous Tests for General Linear Hypotheses
Linear Hypotheses:
Strain comparison#	Estimate	Std. Error	z value	Pr(>|z|)	Signif. Code
D1 - B6 == 0	0.0009134	0.0677434	0.013	1
D2 - B6 == 0	0.116953	0.0640532	1.826	0.5638
D3 - B6 == 0	-0.103259	0.0696942	-1.482	0.8188
D4 - B6 == 0	-0.007571	0.0678516	-0.112	1
D5 - B6 == 0	-0.0954786	0.0690059	-1.384	0.8774
D6 - B6 == 0	0.167839	0.0588535	2.852	0.0665	.
D7 - B6 == 0	0.315491	0.0571169	5.524	<0.001	***
D7F1 - B6 == 0	0.0478355	0.0672886	0.711	0.9999
D9 - B6 == 0	-0.153725	0.0720588	-2.133	0.3455
D10.2 - B6 == 0	-0.073278	0.0724552	-1.011	0.9906
D10.3 - B6 == 0	0.0920341	0.0605244	1.521	0.7929
D11.1 - B6 == 0	-0.199382	0.0631336	-3.158	0.0274	*
D11.2 - B6 == 0	-0.295071	0.0646214	-4.566	<0.001	***
D11.3 - B6 == 0	-0.131858	0.0695063	-1.897	0.5102
D12 - B6 == 0	0.119639	0.0663208	1.804	0.5809
D13 - B6 == 0	-0.0932241	0.0680727	-1.369	0.885
D14 - B6 == 0	0.0285264	0.0650492	0.439	1
D15 - B6 == 0	-0.159556	0.0672259	-2.373	0.2152
D16 - B6 == 0	-0.0605183	0.0685362	-0.883	0.998
D17 - B6 == 0	-0.0639807	0.0661793	-0.967	0.9942
D18 - B6 == 0	0.146252	0.0692663	2.111	0.3595
D19 - B6 == 0	0.0444023	0.0669776	0.663	1
D10.3 - D10.2 == 0	0.165312	0.0608793	2.715	0.0956	.
D11.2 - D11.1 == 0	-0.0956892	0.0543087	-1.762	0.6142
D11.3 - D11.1 == 0	0.0675238	0.0600783	1.124	0.9741
D11.3 - D11.2 == 0	0.163213	0.0616383	2.648	0.1137
Strain abbreviation: D# is B6.PWD-Chr#; D7F1 is B6.PWD-Chr7 x B6 F1
Signif. codes: 0 ‘***’ 0.001 ‘**’ 0.01 ‘*’ 0.05 ‘.’ 0.1 ‘ ’ 1
(Adjusted p values reported -- single-step method)
Fit: glmer(formula = count19 ~ -1 + genotype + (1 | mouse), data = data,
family = poisson(link = "log"), nAGQ = 20)
