# Supplementary material for: Hybrid Sterility Locus on Chromosome X Controls Meiotic Recombination Rate in Mouse
Source: PLoS Genet. 2016 Apr 22;12(4):e1005906. doi: 10.1371/journal.pgen.1005906 (PMC4841592; doi:10.1371/journal.pgen.1005906)
Supplement: S3 Table — (XLSX) [file pgen.1005906.s006.xlsx]

## Sheet: KOs_summary_0924
Table S3. Summary of MLH1 counts in Prdm9 knockout and transgenic males
Mouse strain	Mouse No.	No. of cells	MLH1 - mean	MLH1 - SD*	MLH1 - SE
B6	1	36	24.47	2.14	0.36
B6	2	18	24.28	1.67	0.39
B6	3	4	26	1.15	0.58
B6	4	6	24	1.9	0.77
B6	5	14	24.79	2.39	0.64
B6 - Total		78	24.53	(24.02; 25.06)
B6-Prdm9wt/-	1	20	24.65	2.25	0.5
B6-Prdm9wt/-	2	21	24.14	1.46	0.32
B6-Prdm9wt/-	3	24	24.25	1.57	0.32
B6-Prdm9wt/- - Total		65	24.34	(23.80; 24.92)
B6.BAC5	1	29	24.14	2.03	0.38
B6.BAC5	2	27	24.15	1.81	0.35
B6.BAC5	3	22	24.36	1.5	0.32
B6.BAC5 - Total		78	24.21	(23.72; 24.73)
PWD	1	31	29.94	2.72	0.49
PWD	2	17	28.88	2.09	0.51
PWD	3	21	28.76	2.02	0.44
PWD - Total		69	29.32	(28.58 30.10)
PWD-Prdm9wt/-	1	22	29.23	1.88	0.4
PWD-Prdm9wt/-	2	30	29.47	2.43	0.44
PWD-Prdm9wt/-	3	33	29.55	1.84	0.32
PWD-Prdm9wt/- - Total		85	29.44	(28.76; 30.14)
* The 95% CI based on the used GLM model is given instead of SD for the summary strain statistics.
