# Supplementary material for: Hybrid Sterility Locus on Chromosome X Controls Meiotic Recombination Rate in Mouse
Source: PLoS Genet. 2016 Apr 22;12(4):e1005906. doi: 10.1371/journal.pgen.1005906 (PMC4841592; doi:10.1371/journal.pgen.1005906)
Supplement: S4 Table — (XLSX) [file pgen.1005906.s007.xlsx]

## Sheet: Sheet1
Table S4. Statistics for Prdm9 knockout and transgenic males
Simultaneous Tests for General Linear Hypotheses
Multiple Comparisons of Means: Tukey Contrasts
Linear Hypotheses:
Strain comparison#	Estimate	Std. Error	z value	Pr(>|z|)	Signif. Code
B6-Prdm9wt/- - B6 == 0	-0.03446	0.07213	-0.478	0.989
B6.BAC5 - B6 == 0	-0.05975	0.06916	-0.864	0.908
PWD - B6 == 0	0.62457	0.06103	10.234	<1e-04	***
PWD-Prdm9wt/- - B6 == 0	0.63579	0.05872	10.828	<1e-04	***
B6.BAC5 - B6-Prdm9wt/- == 0	-0.02529	0.07311	-0.346	0.997
PWD - B6-Prdm9wt/- == 0	0.65903	0.06547	10.066	<1e-04	***
PWD-Prdm9wt/- - B6-Prdm9wt/- == 0	0.67026	0.06332	10.585	<1e-04	***
PWD - B6.BAC5 == 0	0.68433	0.06219	11.004	<1e-04	***
PWD-Prdm9wt/- - B6.BAC5 == 0	0.69555	0.05992	11.608	<1e-04	***
PWD-Prdm9wt/- - PWD == 0	0.01122	0.05032	0.223	0.999
Signif. codes: 0 ‘***’ 0.001 ‘**’ 0.01 ‘*’ 0.05 ‘.’ 0.1 ‘ ’ 1
(Adjusted p values reported -- single-step method)
Fit: glmer(formula = count19 ~ genotype - 1 + (1 | mouse), data = data,
family = poisson(link = "log"), nAGQ = 20)
