# Supplementary material for: Hybrid Sterility Locus on Chromosome X Controls Meiotic Recombination Rate in Mouse
Source: PLoS Genet. 2016 Apr 22;12(4):e1005906. doi: 10.1371/journal.pgen.1005906 (PMC4841592; doi:10.1371/journal.pgen.1005906)
Supplement: S5 Table — (XLSX) [file pgen.1005906.s008.xlsx]

## Sheet: consoX_summary_0924
S5 Table. Summary of MLH1 counts in sex chromosome substitution strains
Mouse strain	Mouse No.	No. of cells	MLH1 - mean	MLH1 - SD*	MLH1 - SE
B6	1	24	24.38	2.18	0.45
B6	2	19	25.05	1.72	0.39
B6	3	51	23.31	1.74	0.24
B6	4	93	24.01	2.16	0.22
B6	5	121	24.87	2.07	0.19
B6	6	34	24.5	1.73	0.3
B6	7	36	24.94	1.9	0.32
B6 - Total		378	24.4	(23.87; 24.94)
B6.PWD-Chr X.1	1	123	23.88	2.23	0.2
B6.PWD-Chr X.1	2	93	23.06	1.92	0.2
B6.PWD-Chr X.1	3	21	23.76	1.97	0.43
B6.PWD-Chr X.1	4	25	24.28	2.03	0.41
B6.PWD-Chr X.1	5	44	24.48	2.3	0.35
B6.PWD-Chr X.1 - Total		306	23.74	(23.30; 24.44)
B6.PWD-Chr X.1s	1	118	22.29	1.69	0.16
B6.PWD-Chr X.1s	2	79	21.7	1.74	0.2
B6.PWD-Chr X.1s	3	27	22.59	1.8	0.35
B6.PWD-Chr X.1s	4	21	22.95	2.13	0.47
B6.PWD-Chr X.1s	5	40	22.02	1.87	0.3
B6.PWD-Chr X.1s - Total		285	22.16	(21.85; 22.66)
B6.PWD-Chr X.2	1	74	22.38	1.69	0.2
B6.PWD-Chr X.2	2	66	22.38	1.94	0.24
B6.PWD-Chr X.2	3	19	23.37	2.24	0.51
B6.PWD-Chr X.2	4	37	24.41	1.85	0.3
B6.PWD-Chr X.2	5	30	24.47	1.96	0.36
B6.PWD-Chr X.2	6	29	23.55	1.64	0.3
B6.PWD-Chr X.2	7	35	22.8	1.37	0.23
B6.PWD-Chr X.2	8	29	22.97	2.06	0.38
B6.PWD-Chr X.2	9	36	21.97	1.63	0.27
B6.PWD-Chr X.2 - Total		355	22.96	(22.69; 23.44)
B6.PWD-Chr X.3	1	76	24.5	1.98	0.23
B6.PWD-Chr X.3	2	125	25.66	2.19	0.2
B6.PWD-Chr X.3	3	26	24.08	1.81	0.35
B6.PWD-Chr X.3	4	39	27	2.32	0.37
B6.PWD-Chr X.3	5	38	25.11	2.26	0.37
B6.PWD-Chr X.3 - Total		304	25.34	(24.56; 25.98)
B6.PWD-Chr Y	1	20	24.35	1.76	0.39
B6.PWD-Chr Y	2	20	24.6	1.9	0.43
B6.PWD-Chr Y	3	20	24.5	2.26	0.51
B6.PWD-Chr Y	4	20	24.15	2.13	0.48
B6.PWD-Chr Y	5	15	23.8	1.86	0.48
B6.PWD-Chr Y - Total		95	24.31	(23.61; 25.02)
PWD	1	23	28.83	1.75	0.36
PWD	2	42	28.69	2.41	0.37
PWD	3	84	27.8	2.4	0.26
PWD	4	57	28.4	2.44	0.32
PWD	5	114	29.32	2.61	0.24
PWD - Total		320	28.64	(27.58; 29.69)
* The 95% CI based on the used GLMM model is given instead of SD for the summary strain statistics.
