# Supplementary material for: Hybrid Sterility Locus on Chromosome X Controls Meiotic Recombination Rate in Mouse
Source: PLoS Genet. 2016 Apr 22;12(4):e1005906. doi: 10.1371/journal.pgen.1005906 (PMC4841592; doi:10.1371/journal.pgen.1005906)
Supplement: S6 Table — (XLSX) [file pgen.1005906.s009.xlsx]

## Sheet: Sheet1
S6 Table. Statistics for sex chromosome substitution strains
Simultaneous Tests for General Linear Hypotheses
Linear Hypotheses:
Strain comparison#	Estimate	Std. Error	z value	Pr(>|z|)	Signif. Code
DX.1 - B6 == 0	-0.10784	0.07653	-1.409	0.7192
DX.1s - B6 == 0	-0.51248	0.07958	-6.44	<0.001	***
DX.2 - B6 == 0	-0.28555	0.06766	-4.22	<0.001	***
DX.3 - B6 == 0	0.14744	0.07483	1.97	0.3567
DY - B6 == 0	-0.01992	0.08318	-0.239	0.9999
DX.1s - DX.1 == 0	-0.40464	0.08558	-4.728	<0.001	***
DX.2 - DX.1 == 0	-0.17771	0.07466	-2.38	0.1613
DX.3 - DX.1 == 0	0.25527	0.08124	3.142	0.0205	*
DY - DX.1 == 0	0.08792	0.08898	0.988	0.921
DX.2 - DX.1s == 0	0.22693	0.07777	2.918	0.0405	*
DX.3 - DX.1s == 0	0.65992	0.08415	7.842	<0.001	***
DY - DX.1s == 0	0.49256	0.09163	5.375	<0.001	***
DX.3 - DX.2 == 0	0.43298	0.07293	5.937	<0.001	***
DY - DX.2 == 0	0.26563	0.08147	3.26	0.0141	*
DY - DX.3 == 0	-0.16735	0.08748	-1.913	0.391
Strain abbreviation: D# is B6.PWD-Chr#; D7F1 is B6.PWD-Chr7 x B6 F1
Signif. codes: 0 ‘***’ 0.001 ‘**’ 0.01 ‘*’ 0.05 ‘.’ 0.1 ‘ ’ 1
(Adjusted p values reported -- single-step method)
Fit: glmer(formula = count19 ~ -1 + genotype + (1 | mouse), data = data,
family = poisson(link = "log"), nAGQ = 20)
