# Supplementary material for: Hybrid Sterility Locus on Chromosome X Controls Meiotic Recombination Rate in Mouse
Source: PLoS Genet. 2016 Apr 22;12(4):e1005906. doi: 10.1371/journal.pgen.1005906 (PMC4841592; doi:10.1371/journal.pgen.1005906)
Supplement: S7 Table — (XLSX) [file pgen.1005906.s010.xlsx]

## Sheet: samice_summary_0924_final
S7 Table. Summary of MLH1 counts in female X-chromosome substitution strains
Mouse strain	Mouse No.	No. of cells	MLH1 - mean	MLH1 - SD*	MLH1 - SE
B6	1	20	28.8	4.09	0.91
B6	2	20	30.45	4.44	0.99
B6	3	20	29.6	2.56	0.57
B6	4	20	29.55	3.58	0.8
B6	5	20	29.65	3.39	0.76
B6 - Total		100	29.61	(28.92; 30.33)
DX.1	1	20	30.25	5.46	1.22
DX.1	2	19	32.37	4.04	0.93
DX.1	3	20	30.95	2.28	0.51
DX.1	4	20	29.1	3.28	0.73
DX.1	5	17	31.53	4.84	1.17
DX.1 - Total		96	30.8	(30.06; 31.59)
DX.1s	1	15	28.13	3.09	0.8
DX.1s	2	20	27.85	3.03	0.68
DX.1s	3	10	28.5	3.95	1.25
DX.1s	4	20	28.4	4.65	1.04
DX.1s	5	19	26.26	2.05	0.47
DX.1s	6	19	26.74	2.88	0.66
DX.1s - Total		103	27.56	(26.98; 28.19)
DX.2	1	19	24.68	1.67	0.38
DX.2	2	21	25.38	2.31	0.5
DX.2	3	14	25.43	2.14	0.57
DX.2	4	21	25.1	2	0.44
DX.2	5	16	24.38	1.82	0.46
DX.2 - Total		91	25	(24.49; 25.54)
DX.3	1	23	29.65	2.48	0.52
DX.3	2	22	28.55	2.72	0.58
DX.3	3	18	27.72	1.6	0.38
DX.3	4	21	28.62	2.16	0.47
DX.3	5	19	28.58	2.46	0.56
DX.3 - Total		103	28.67	(28.01; 29.33)
PWD	1	20	26.15	3.5	0.78
PWD	2	20	25.6	2.96	0.66
PWD	3	18	24.78	2.46	0.58
PWD	4	20	25	2.45	0.55
PWD - Total		78	25.4	(24.82; 26.00)
* The 95% CI based on the used GLMM model is given instead of SD for the summary strain statistics.
