# Supplementary material for: Hybrid Sterility Locus on Chromosome X Controls Meiotic Recombination Rate in Mouse
Source: PLoS Genet. 2016 Apr 22;12(4):e1005906. doi: 10.1371/journal.pgen.1005906 (PMC4841592; doi:10.1371/journal.pgen.1005906)
Supplement: S8 Table — (XLSX) [file pgen.1005906.s011.xlsx]

## Sheet: Sheet1
S8 Table. Statistics for female X-linked chromosome substitution strains
Simultaneous Tests for General Linear Hypotheses
Linear Hypotheses:
Strain comparison#	Estimate	Std. Error	z value	Pr(>|z|)	Signif. Code
DX.1 - B6 == 0	0.10678	0.04525	2.36	0.1254
DX.1s - B6 == 0	-0.21386	0.0478	-4.474	<0.001	***
DX.2 - B6 == 0	-0.57016	0.05476	-10.413	<0.001	***
DX.3 - B6 == 0	-0.09326	0.04659	-2.002	0.2632
DX.1s - DX.1 == 0	-0.32065	0.04716	-6.799	<0.001	***
DX.2 - DX.1 == 0	-0.67694	0.05422	-12.486	<0.001	***
DX.3 - DX.1 == 0	-0.20004	0.04597	-4.352	<0.001	***
DX.2 - DX.1s == 0	-0.35629	0.05637	-6.321	<0.001	***
DX.3 - DX.1s == 0	0.12061	0.04849	2.487	0.0926	.
DX.3 - DX.2 == 0	0.4769	0.05533	8.619	<0.001	***
Strain abbreviation: D# is B6.PWD-Chr#; D7F1 is B6.PWD-Chr7 x B6 F1
Signif. codes: 0 ‘***’ 0.001 ‘**’ 0.01 ‘*’ 0.05 ‘.’ 0.1 ‘ ’ 1
(Adjusted p values reported -- single-step method)
Fit: glmer(formula = count19 ~ -1 + genotype + (1 | mouse), data = data,
family = poisson(link = "log"), nAGQ = 20)
