# Supplementary material for: Hybrid Sterility Locus on Chromosome X Controls Meiotic Recombination Rate in Mouse
Source: PLoS Genet. 2016 Apr 22;12(4):e1005906. doi: 10.1371/journal.pgen.1005906 (PMC4841592; doi:10.1371/journal.pgen.1005906)
Supplement: S9 Table — (XLSX) [file pgen.1005906.s012.xlsx]

## Sheet: RAD51_summary
S9 Table. Summary of RAD51/DMC1 counts
Mouse strain	Mouse No.	No. of cells	RAD51/DMC1 - mean	RAD51/DMC1 - SD*	RAD51/DMC1 - SE
B6	1	25	244.28	19.0231	3.80461
B6	2	17	198.471	12.248	2.97059
B6	3	10	206.8	19.8595	6.28013
B6	4	23	212.696	21.2248	4.42569
B6	5	32	214.5	13.6121	2.40631
B6	6	16	211.625	13.3909	3.34773
B6 - Total		123	212.481	(208.09; 216.87)
D7	1	16	198.625	19.404	4.85101
D7	2	23	200.435	17.596	3.66903
D7	3	25	203.4	20.2896	4.05791
D7	4	24	199.5	18.1348	3.70174
D7 - Total		88	199.905	(194.70; 205.11)
DX.1s	1	25	191.2	15.7639	3.15278
DX.1s	2	15	195.8	16.9503	4.37656
DX.1s	3	25	190.88	20.945	4.189
DX.1s	4	23	195.826	15.3405	3.19872
DX.1s	5	17	197.294	19.1826	4.65245
DX.1s - Total		105	193.547	(188.82; 198.27)
PWD	1	12	216.833	27.0314	7.8033
PWD	2	15	218.867	23.6004	6.09361
PWD	3	20	223.05	17.2	3.84603
PWD	4	10	220.9	18.9587	5.99528
PWD	5	19	222.316	15.6775	3.59666
PWD - Total		76	220.556	(215.33; 225.78)
* The 95% CI based on the used robust LMM model is given instead of SD for the summary strain statistics.
