# Supplementary material for: Hybrid Sterility Locus on Chromosome X Controls Meiotic Recombination Rate in Mouse
Source: PLoS Genet. 2016 Apr 22;12(4):e1005906. doi: 10.1371/journal.pgen.1005906 (PMC4841592; doi:10.1371/journal.pgen.1005906)
Supplement: S10 Table — (XLSX) [file pgen.1005906.s013.xlsx]

## Sheet: Sheet1
S10 Table. Statistics of RAD51/DMC1 counts
Linear Hypotheses:
Strain comparison#	Estimate	Std. Error	t value	p-value	Adj. p-value
D7 - B6 == 0	-12.576	3.475	-3.62	0.00678259	0.033913
DX.1s - B6 == 0	-18.934	3.291	-5.75	0.000276296	0.00138148
PWD - B6 == 0	8.076	3.482	2.32	0.0454858	0.227429
D7 - PWD == 0	-20.652	3.764	-5.49	0.000916197	0.00458098
DX.1s - PWD == 0	-27.01	3.595	-7.51	6.86249e-05	0.000343125
Strain abbreviation: D# is B6.PWD-Chr#
p-value is an unadjusted p-value.
Adj. p-value is the p-value adjusted by Bonferroni correction for the 5 comparisons of interest.
Robust linear mixed model fit by DAStau
Formula: count ~ -1 + genotype + (1 | mouse)
Rho functions used for fitting:
Residuals:
eff: smoothed Huber (k = 1.345, s = 10)
sig: smoothed Huber, Proposal II (k = 1.345, s = 10)
Random Effects, variance component 1 (mouse):
eff: smoothed Huber (k = 1.345, s = 10)
vcp: smoothed Huber, Proposal II (k = 2.6, s = 10)
